# Supplementary material for: Ferrocenylmethylation reactions with a phosphinoferrocene betaine
Source: Royal Society of Chemistry journal article supplement (doi:10.1039/c5dt01877c), 2015-01-01
Supplement: c5dt01877c1.pdf [file c5dt01877c1.pdf]

# Supporting Information

for

**Ferrocenylmethylation reactions with a phosphinoferrocene betaine**

Martin Zábranský, Ivana Císařová and Petr Štěpnička\*

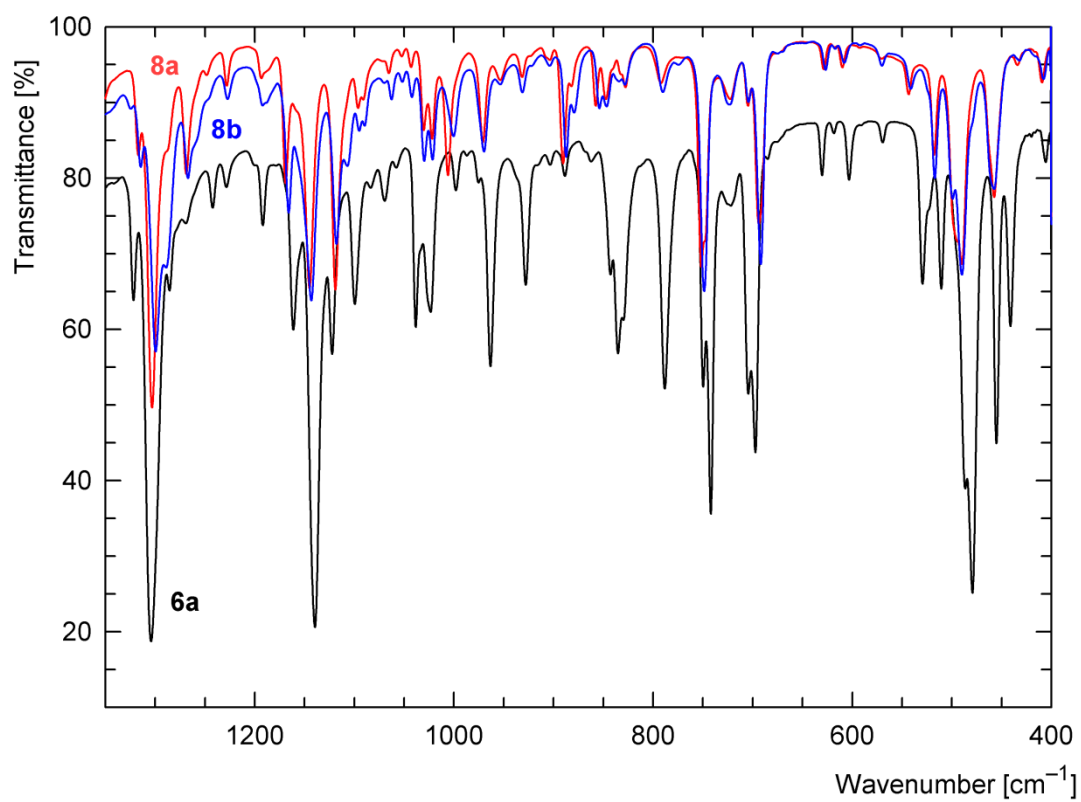

**Figure S1.** IR spectra of sulfone **6a** (black) and its Zn-Na complexes **8a** (red) and **8b** (blue).

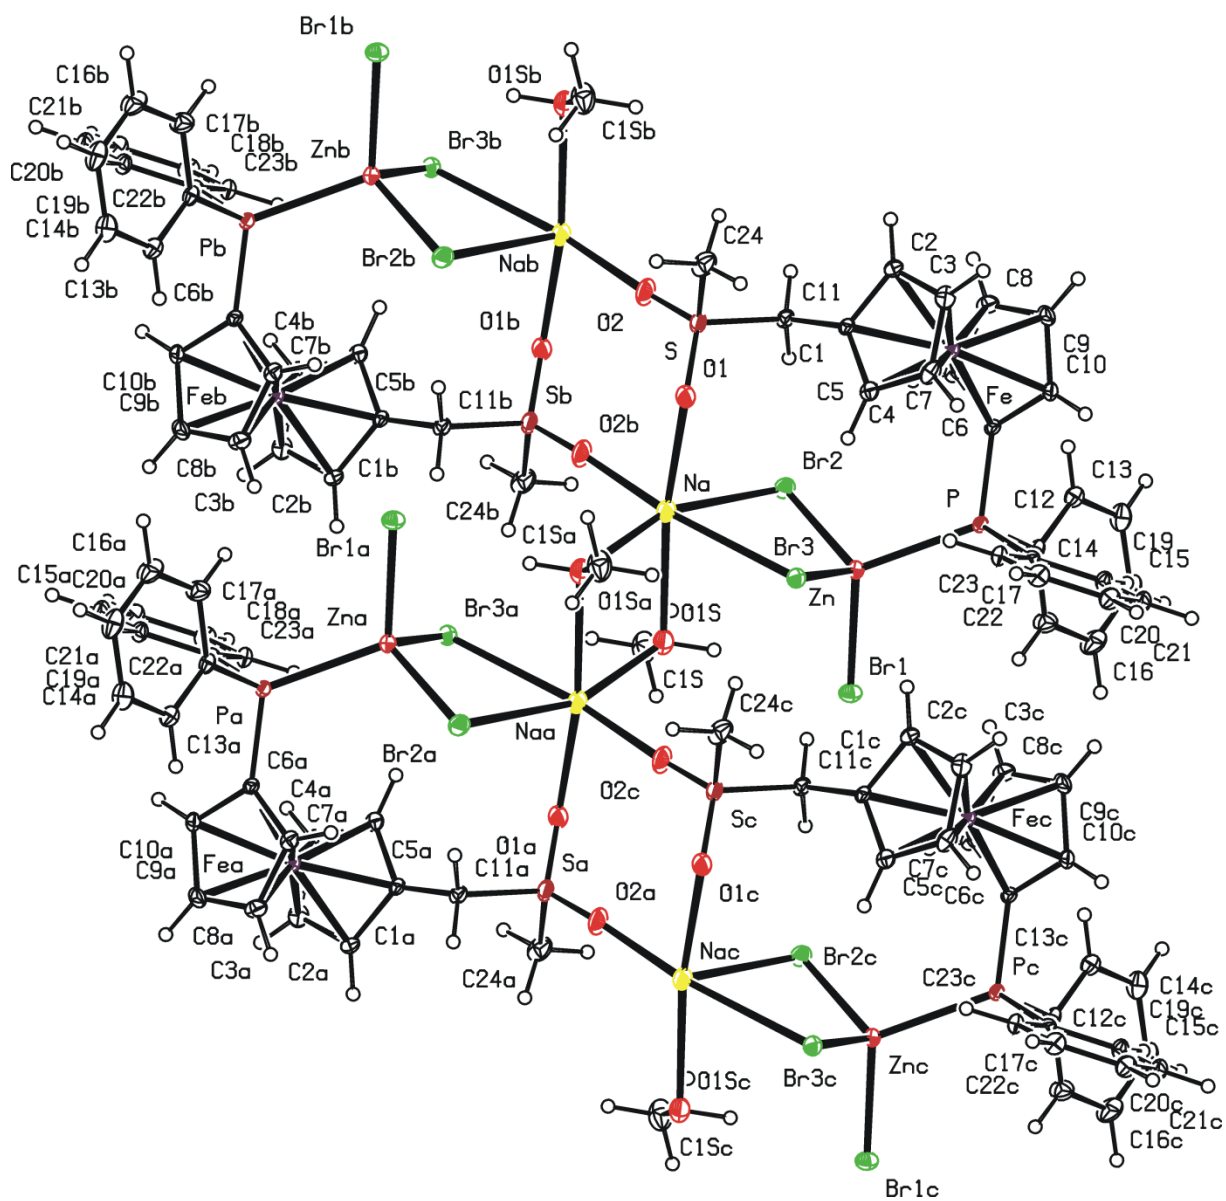

**Figure S2.** PLATON plot of the structure of **8a** (30% probability ellipsoids).

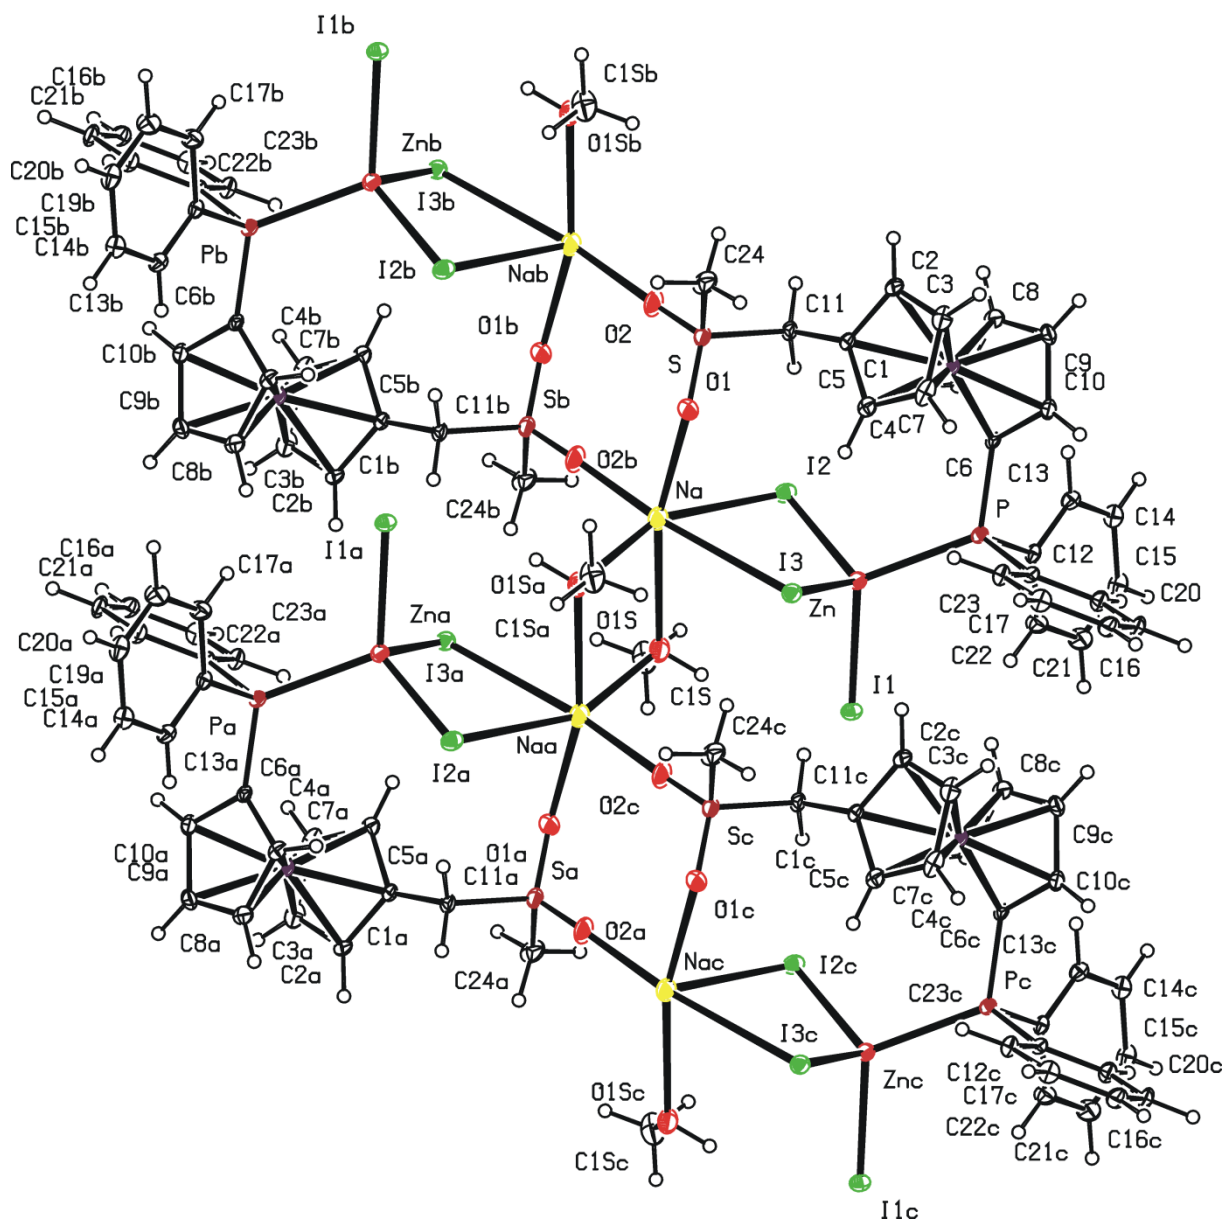

Figure S3. PLATON plot of the structure of **8b** (30% probability ellipsoids).

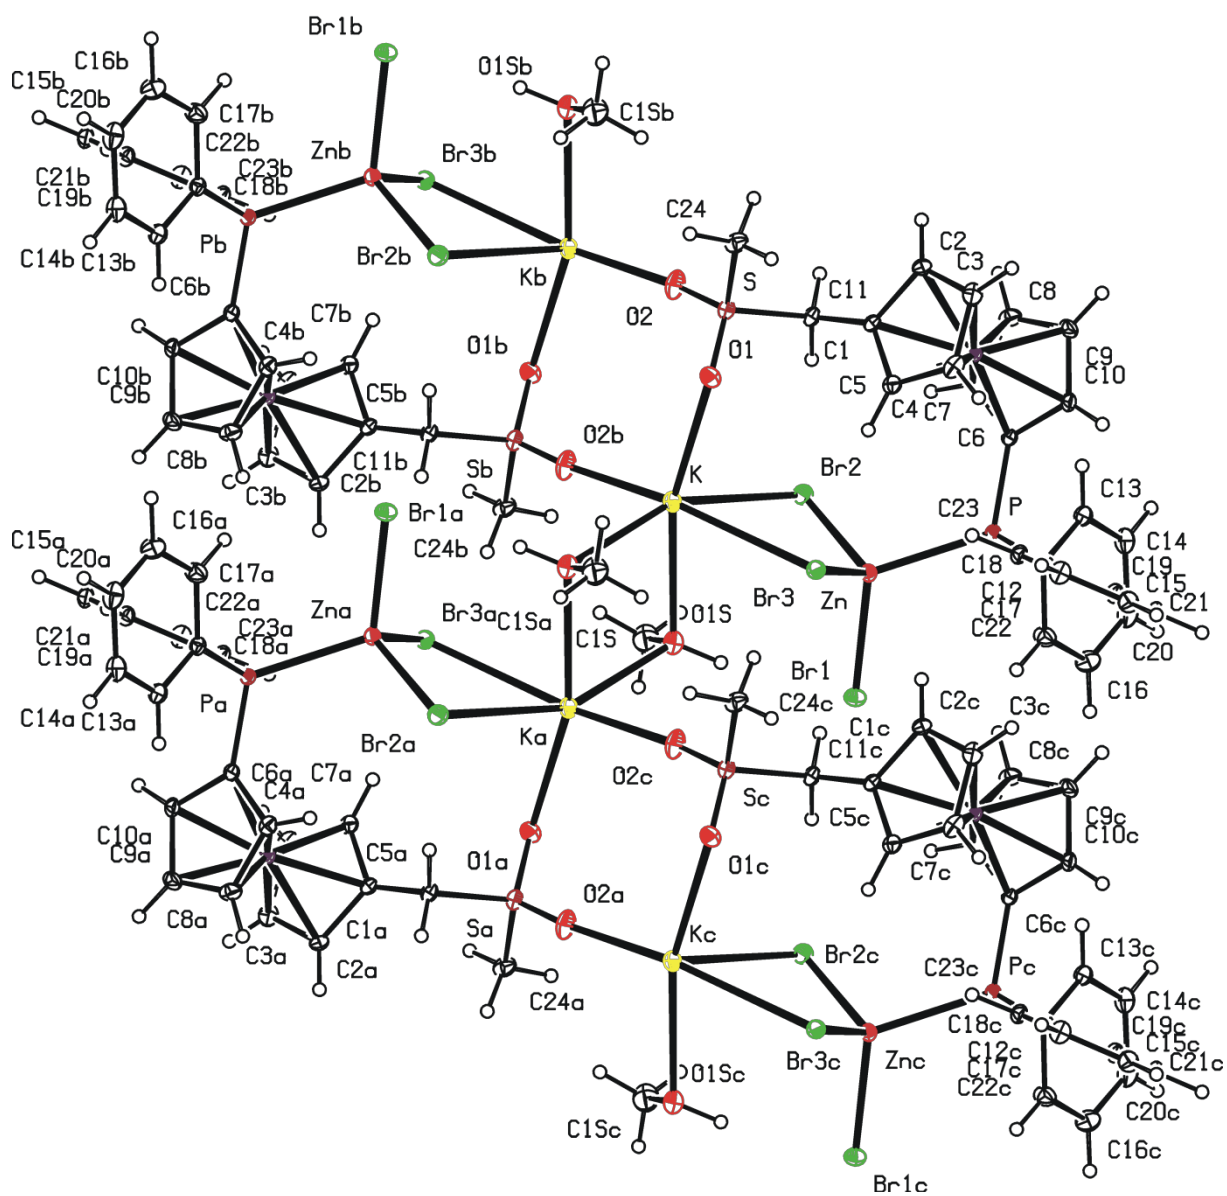

**Figure S4.** PLATON plot of the structure of **9a** (30% probability ellipsoids).

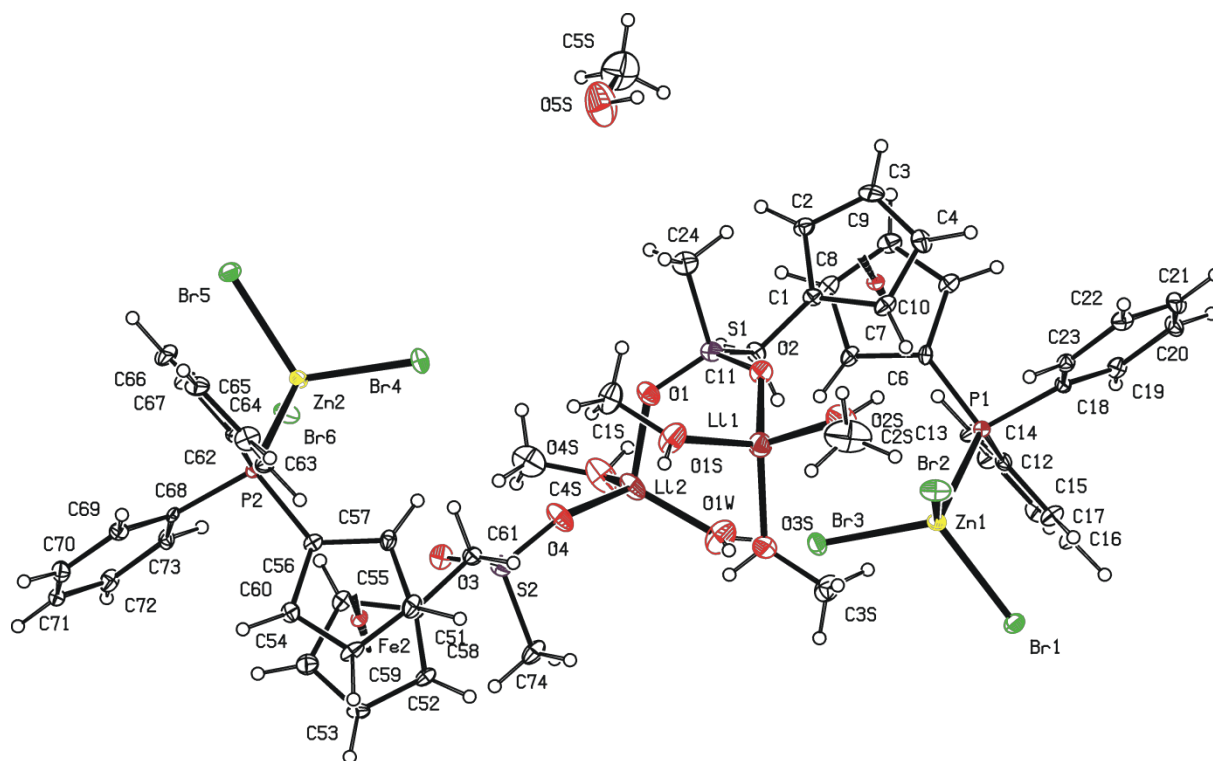

**Figure S5.** PLATON plot of the structure of **10a**·CH<sub>3</sub>OH (30% probability ellipsoids).

## Crystallization conditions

Single crystals suitable for X-ray diffraction analysis were obtained by liquid-phase diffusion of diethyl ether *and* tetrahydrofuran into a solution in methanol (**2**·CH<sub>3</sub>OH: orange prism, 0.30 × 0.38 × 0.50 mm<sup>3</sup>) or similarly from hexane-ethyl acetate (**6a**: orange prism, 0.18 × 0.33 × 0.46 mm<sup>3</sup>; **6b**: orange prism, 0.52 × 0.59 × 0.72 mm<sup>3</sup>; **6c**: orange prism, 0.27 × 0.39 × 0.53 mm<sup>3</sup>) and chloroform-hexane **7** (orange prism, 0.32 × 0.40 × 0.42 mm<sup>3</sup>). The crystals of **5** were grown from hot heptane (orange plate, 0.16 × 0.34 × 0.51 mm<sup>3</sup>), while crystals of **6a'** separated during an attempted crystallization of a **6a**-ZnBr<sub>2</sub> mixture from methanol-diethyl ether (orange plate, 0.12 × 0.32 × 0.47 mm<sup>3</sup>). Finally, the crystals of the alkali metal-Zn complexes were selected from the preparative batches (see the main text; **8a**: orange prism, 0.14 × 0.21 × 0.49 mm<sup>3</sup>; **8b**: orange prism, 0.11 × 0.13 × 0.20 mm<sup>3</sup>; **9a**: orange prism, 0.22 × 0.27 × 0.45 mm<sup>3</sup>; **10a**: orange plate, 0.09 × 0.17 × 0.37 mm<sup>3</sup>).

**Table S1.** Summary of relevant crystallographic data and structure refinement parameters.<sup>a</sup>

| Compound                                         | <b>2</b> ·CH <sub>3</sub> OH                         | <b>5</b>                                    | <b>6a</b>                                           |
|--------------------------------------------------|------------------------------------------------------|---------------------------------------------|-----------------------------------------------------|
| Formula                                          | C <sub>29</sub> H <sub>36</sub> FeNO <sub>4</sub> PS | C <sub>23</sub> H <sub>21</sub> FeP         | C <sub>24</sub> H <sub>23</sub> FeO <sub>2</sub> PS |
| <i>M</i>                                         | 581.47                                               | 384.22                                      | 462.30                                              |
| Crystal system                                   | triclinic                                            | monoclinic                                  | triclinic                                           |
| Space group                                      | <i>P</i> -1 (no. 2)                                  | <i>P</i> 2 <sub>1</sub> / <i>c</i> (no. 14) | <i>P</i> -1 (no. 2)                                 |
| <i>a</i> [Å]                                     | 7.0893(3)                                            | 8.7389(2)                                   | 7.8229(4)                                           |
| <i>b</i> [Å]                                     | 9.9492(3)                                            | 16.9638(4)                                  | 11.1181(5)                                          |
| <i>c</i> [Å]                                     | 19.5949(7)                                           | 13.0688(3)                                  | 12.0934(6)                                          |
| $\alpha$ [°]                                     | 95.151(1)                                            |                                             | 101.649(2)                                          |
| $\beta$ [°]                                      | 95.806(1)                                            | 107.331(1)                                  | 94.256(2)                                           |
| $\gamma$ [°]                                     | 98.625(1)                                            |                                             | 90.378(2)                                           |
| <i>V</i> [Å <sup>3</sup> ]                       | 1351.68(9)                                           | 1849.43(7)                                  | 1027.08(9)                                          |
| <i>Z</i>                                         | 2                                                    | 4                                           | 2                                                   |
| <i>D</i> <sub>calc</sub> [g cm <sup>-3</sup> ]   | 1.429                                                | 1.380                                       | 1.495                                               |
| $\mu$ (MoK $\alpha$ ) [mm <sup>-1</sup> ]        | 0.731                                                | 0.904                                       | 0.932                                               |
| Diffns total                                     | 23173                                                | 17737                                       | 12206                                               |
| Independent/obsd <sup>[b]</sup> diffns           | 6191/5736                                            | 4242/3747                                   | 4682/4224                                           |
| <i>R</i> <sub>int</sub> <sup>[c]</sup>           | 1.69                                                 | 2.07                                        | 1.66                                                |
| Parameters                                       | 337                                                  | 227                                         | 263                                                 |
| <i>R</i> (obsd diffns) [%] <sup>b,c</sup>        | 2.53                                                 | 2.73                                        | 2.50                                                |
| <i>R</i> , <i>wR</i> (all data) [%] <sup>c</sup> | 2.80, 6.60                                           | 3.30, 7.22                                  | 2.91, 6.52                                          |
| $\Delta\rho$ [e Å <sup>-3</sup> ]                | 0.30, -0.37                                          | 0.49, -0.30                                 | 0.35, -0.29                                         |



**Table S1 continued**

| Compound                                         | <b>6a'</b>                                          | <b>6b</b>                                           | <b>6c</b>                                           |
|--------------------------------------------------|-----------------------------------------------------|-----------------------------------------------------|-----------------------------------------------------|
| Formula                                          | C <sub>24</sub> H <sub>23</sub> FeO <sub>2</sub> PS | C <sub>29</sub> H <sub>25</sub> FeO <sub>2</sub> PS | C <sub>30</sub> H <sub>27</sub> FeO <sub>2</sub> PS |
| <i>M</i>                                         | 462.30                                              | 524.37                                              | 538.40                                              |
| Crystal system                                   | monoclinic                                          | monoclinic                                          | triclinic                                           |
| Space group                                      | <i>P</i> 2 <sub>1</sub> / <i>c</i> (no. 14)         | <i>P</i> 2 <sub>1</sub> / <i>c</i> (no. 14)         | <i>P</i> -1 (no. 2)                                 |
| <i>a</i> [Å]                                     | 14.1802(9)                                          | 16.2612(6)                                          | 8.2576(5)                                           |
| <i>b</i> [Å]                                     | 9.4057(5)                                           | 18.1098(7)                                          | 12.8146(9)                                          |
| <i>c</i> [Å]                                     | 15.804(1)                                           | 8.3519(3)                                           | 13.7867(9)                                          |
| $\alpha$ [°]                                     |                                                     |                                                     | 110.459(2)                                          |
| $\beta$ [°]                                      | 90.557(3)                                           | 96.312(1)                                           | 102.564(3)                                          |
| $\gamma$ [°]                                     |                                                     |                                                     | 99.109(2)                                           |
| <i>V</i> [Å <sup>3</sup> ]                       | 2107.7(2)                                           | 2444.6(2)                                           | 1289.6(2)                                           |
| <i>Z</i>                                         | 4                                                   | 4                                                   | 2                                                   |
| <i>D</i> <sub>calc</sub> [g cm <sup>-3</sup> ]   | 1.457                                               | 1.425                                               | 1.387                                               |
| $\mu$ (MoK $\alpha$ ) [mm <sup>-1</sup> ]        | 0.909                                               | 0.793                                               | 0.754                                               |
| Diffns total                                     | 16500                                               | 22343                                               | 13745                                               |
| Independent/obsd <sup>[b]</sup> diffns           | 4836/3929                                           | 5615/5161                                           | 5908/5235                                           |
| <i>R</i> <sub>int</sub> <sup>[c]</sup>           | 3.22                                                | 1.72                                                | 2.93                                                |
| Parameters                                       | 263                                                 | 307                                                 | 317                                                 |
| <i>R</i> (obsd diffns) [%] <sup>b,c</sup>        | 3.31                                                | 2.69                                                | 3.63                                                |
| <i>R</i> , <i>wR</i> (all data) [%] <sup>c</sup> | 4.61, 7.84                                          | 3.01, 6.97                                          | 4.19, 10.3                                          |
| $\Delta\rho$ [e Å <sup>-3</sup> ]                | 0.90, -0.33                                         | 0.38, -0.36                                         | 1.22, <sup>d</sup> -0.45                            |

**Table S1 continued**

| Compound                                         | <b>7</b>                                         | <b>8a</b>                                                               | <b>8b</b>                                                              |
|--------------------------------------------------|--------------------------------------------------|-------------------------------------------------------------------------|------------------------------------------------------------------------|
| Formula                                          | C <sub>40</sub> H <sub>34</sub> FeP <sub>2</sub> | C <sub>25</sub> H <sub>27</sub> Br <sub>3</sub> FeNaO <sub>3</sub> PSZn | C <sub>25</sub> H <sub>27</sub> FeI <sub>3</sub> NaO <sub>3</sub> PSZn |
| <i>M</i>                                         | 632.46                                           | 822.44                                                                  | 963.41                                                                 |
| Crystal system                                   | triclinic                                        | triclinic                                                               | triclinic                                                              |
| Space group                                      | <i>P</i> -1 (no. 2)                              | <i>P</i> -1 (no. 2)                                                     | <i>P</i> -1 (no. 2)                                                    |
| <i>a</i> [Å]                                     | 9.9555(3)                                        | 8.7397(2)                                                               | 8.9509(2)                                                              |
| <i>b</i> [Å]                                     | 11.1437(3)                                       | 9.2716(2)                                                               | 9.5006(2)                                                              |
| <i>c</i> [Å]                                     | 15.0607(4)                                       | 18.1021(5)                                                              | 18.2554(4)                                                             |
| $\alpha$ [°]                                     | 71.439(1)                                        | 91.264(1)                                                               | 91.0698(9)                                                             |
| $\beta$ [°]                                      | 80.375(1)                                        | 100.075(1)                                                              | 99.5953(8)                                                             |
| $\gamma$ [°]                                     | 86.098(1)                                        | 95.088(1)                                                               | 95.3065(7)                                                             |
| <i>V</i> [Å <sup>3</sup> ]                       | 1561.45(8)                                       | 1437.46(6)                                                              | 1523.22(6)                                                             |
| <i>Z</i>                                         | 2                                                | 2                                                                       | 2                                                                      |
| <i>D</i> <sub>calc</sub> [g cm <sup>-3</sup> ]   | 1.345                                            | 1.900                                                                   | 2.101                                                                  |
| $\mu$ (MoK $\alpha$ ) [mm <sup>-1</sup> ]        | 0.614                                            | 5.678                                                                   | 4.464                                                                  |
| Diffns total                                     | 23640                                            | 21875                                                                   | 19034                                                                  |
| Indep/obsd <sup>[b]</sup> diffns                 | 7169/6067                                        | 6597/5423                                                               | 6997/6007                                                              |
| <i>R</i> <sub>int</sub> <sup>[c]</sup>           | 2.79                                             | 2.39                                                                    | 2.38                                                                   |
| Parameters                                       | 388                                              | 327                                                                     | 327                                                                    |
| <i>R</i> (obsd diffns) [%] <sup>b,c</sup>        | 3.86                                             | 2.87                                                                    | 2.70                                                                   |
| <i>R</i> , <i>wR</i> (all data) [%] <sup>c</sup> | 4.77, 10.8                                       | 4.08, 6.51                                                              | 3.38, 5.76                                                             |
| $\Delta\rho$ [e Å <sup>-3</sup> ]                | 0.97, <sup>d</sup> -0.31                         | 0.76, -0.72                                                             | 1.86, <sup>e</sup> -0.82                                               |

**Table S1 continued**

| Compound                                         | <b>9a</b>                                                              | <b>10a</b> ·CH <sub>3</sub> OH                                                                                                                |
|--------------------------------------------------|------------------------------------------------------------------------|-----------------------------------------------------------------------------------------------------------------------------------------------|
| Formula                                          | C <sub>25</sub> H <sub>27</sub> Br <sub>3</sub> FeKO <sub>3</sub> PSZn | C <sub>53</sub> H <sub>68</sub> Br <sub>6</sub> Fe <sub>2</sub> Li <sub>2</sub> O <sub>10</sub> P <sub>2</sub> S <sub>2</sub> Zn <sub>2</sub> |
| <i>M</i>                                         | 838.55                                                                 | 1726.91                                                                                                                                       |
| Crystal system                                   | triclinic                                                              | triclinic                                                                                                                                     |
| Space group                                      | <i>P</i> -1 (no. 2)                                                    | <i>P</i> 1 (no. 1) <sup>f</sup>                                                                                                               |
| <i>a</i> [Å]                                     | 8.8279(3)                                                              | 8.5888(7)                                                                                                                                     |
| <i>b</i> [Å]                                     | 9.3796(3)                                                              | 9.6908(6)                                                                                                                                     |
| <i>c</i> [Å]                                     | 18.2463(5)                                                             | 19.623(2)                                                                                                                                     |
| $\alpha$ [°]                                     | 88.457(1)                                                              | 85.139(3)                                                                                                                                     |
| $\beta$ [°]                                      | 80.307(1)                                                              | 80.198(3)                                                                                                                                     |
| $\gamma$ [°]                                     | 85.691(1)                                                              | 85.628(3)                                                                                                                                     |
| <i>V</i> [Å <sup>3</sup> ]                       | 1484.90(8)                                                             | 1600.5(2)                                                                                                                                     |
| <i>Z</i>                                         | 2                                                                      | 1                                                                                                                                             |
| <i>D</i> <sub>calc</sub> [g cm <sup>-3</sup> ]   | 1.875                                                                  | 1.792                                                                                                                                         |
| $\mu$ (MoK $\alpha$ ) [mm <sup>-1</sup> ]        | 5.622                                                                  | 5.096                                                                                                                                         |
| Diffns total                                     | 20827                                                                  | 32003                                                                                                                                         |
| Indep/obsd <sup>[b]</sup> diffns                 | 6801/5876                                                              | 14458/11651                                                                                                                                   |
| <i>R</i> <sub>int</sub> <sup>[c]</sup>           | 2.27                                                                   | 3.48                                                                                                                                          |
| Parameters                                       | 326                                                                    | 716                                                                                                                                           |
| <i>R</i> (obsd diffns) [%] <sup>b,c</sup>        | 2.33                                                                   | 3.53                                                                                                                                          |
| <i>R</i> , <i>wR</i> (all data) [%] <sup>c</sup> | 3.19, 4.99                                                             | 5.40, 6.87                                                                                                                                    |
| $\Delta\rho$ [e Å <sup>-3</sup> ]                | 0.91, -0.38                                                            | 0.78, -0.76                                                                                                                                   |

<sup>a</sup> Common details: *T* = 150(2) K. <sup>b</sup> Observed diffractions with  $I_o \geq 2\sigma(I_o)$ . <sup>c</sup> Definitions:  $R_{\text{int}} = \Sigma |F_o^2 - F_o^2(\text{mean})| / \Sigma F_o^2$ , where  $F_o^2(\text{mean})$  is the average intensity of symmetry-equivalent diffractions.  $R(F) = \Sigma (|F_o| - |F_c|) / \Sigma |F_o|$ ;  $wR(F^2) = \{\Sigma [w(F_o^2 - F_c^2)^2] / \Sigma w(F_o^2)^2\}^{1/2}$ . <sup>d</sup> Residual electron density attributable to the lone electron pair at the phosphorus atom. <sup>e</sup> Residual electron density in the vicinity of heavy atoms (iodine). <sup>f</sup> Flack's enantiomorph parameter: -0.013(6).
